# Supplementary material for: Pat1 contributes to the RNA binding activity of the Lsm1-7–Pat1 complex
Source: PubMed Central journal article supplement — RNA. 2014 Sep;20(9):1465–75. doi: 10.1261/rna.045252.114 (PMC4138329; doi:10.1261/rna.045252.114), 2014-09

## LEGENDS TO SUPPLEMENTARY FIGURES

**Figure S1. Pat1C is severely impaired in its ability to bind RNA and does not exhibit a binding preference for oligoadenylated RNA.** BSA or increasing concentrations of Pat1C expressed and purified from *E. coli* (indicated on top) was subjected to gel shift assays using uniformly radiolabeled *PGK1* and *PGK1-A<sub>5</sub>* RNAs. Plots of % RNA bound (quantitated using phosphorimager) versus the concentration of the protein used are shown directly below the phosphorimages of the gels.

**Figure S2. Lsm7 contacts RNA in the Lsm1-7-Pat1 complex.** Lsm1-7-Pat1 complex purified from an *LSM5-6xHis* or an *LSM7-6xHis* strain was subjected to UV crosslinking in the presence of uniformly radiolabeled *PGK1* RNA for varying lengths of time (indicated at the bottom). After ribonuclease treatment, the crosslinked proteins were visualized by denaturing PAGE and autoradiography. SDS-PAGE of the purified Lsm1-7-Pat1 complexes and autoradiograph of the crosslinked proteins are shown in the left and right panels respectively.

**Figure S3. A,** Longer exposure of the autoradiograph shown in Figure 4C is shown. **B,** *pat1Δ* cells bearing a *CEN* plasmid expressing Pat1 or Pat1-AA (Pat1 in which S456 and S457 are changed to Alanines) from native promoter or the empty vector were grown to log phase followed by extraction of the RNA from them and Northern analysis to visualize the *MFA2pG* mRNA.

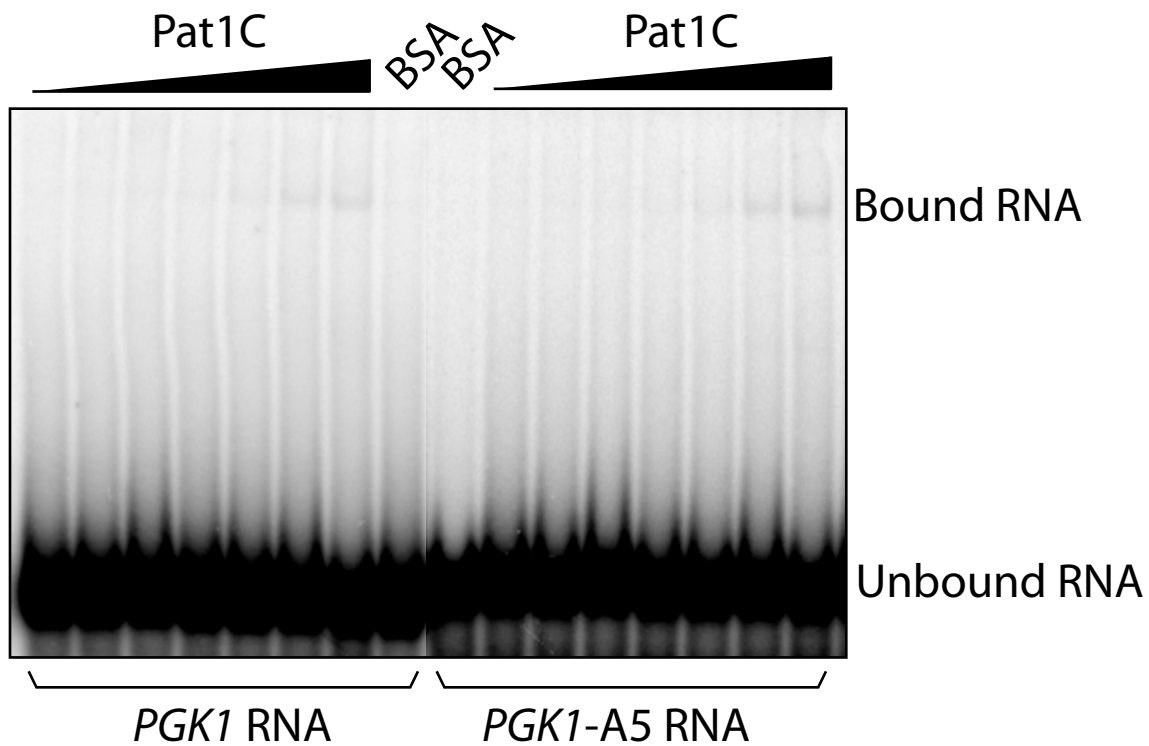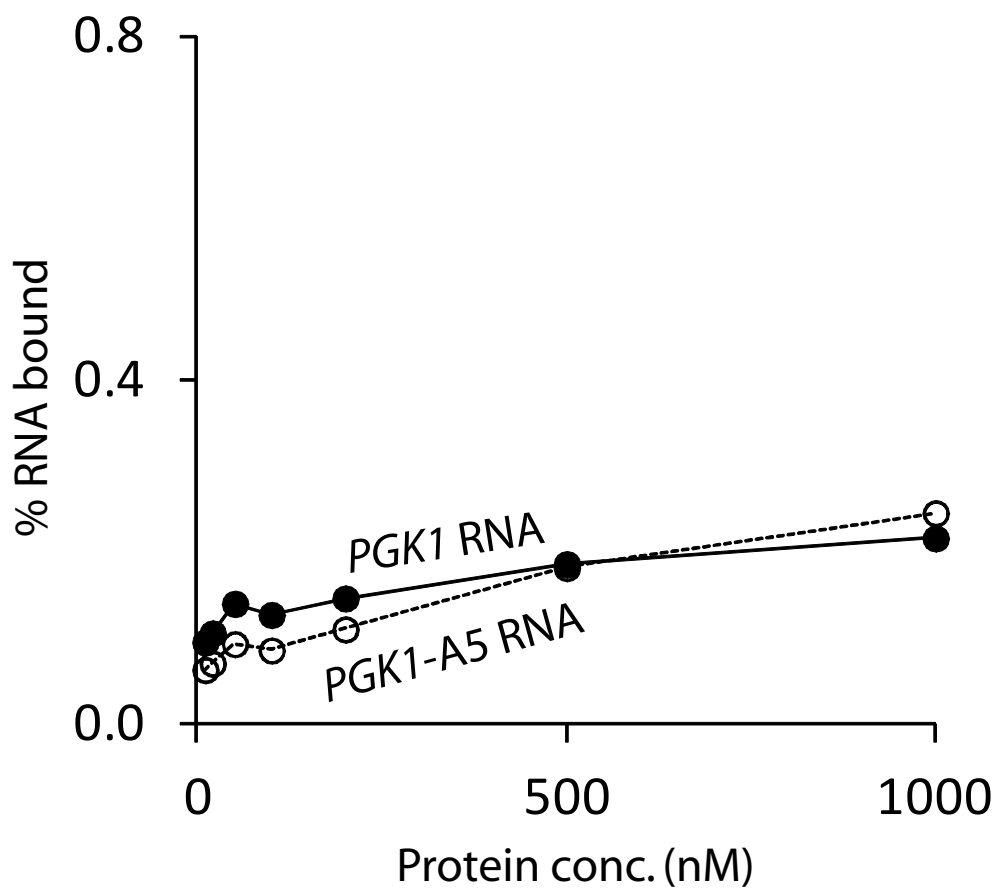

Strain from which the wild  
type complex was purified

*LSM5-6xHis*  
*LSM7-6xHis*

*LSM7-6xHis* *LSM5-6xHis*

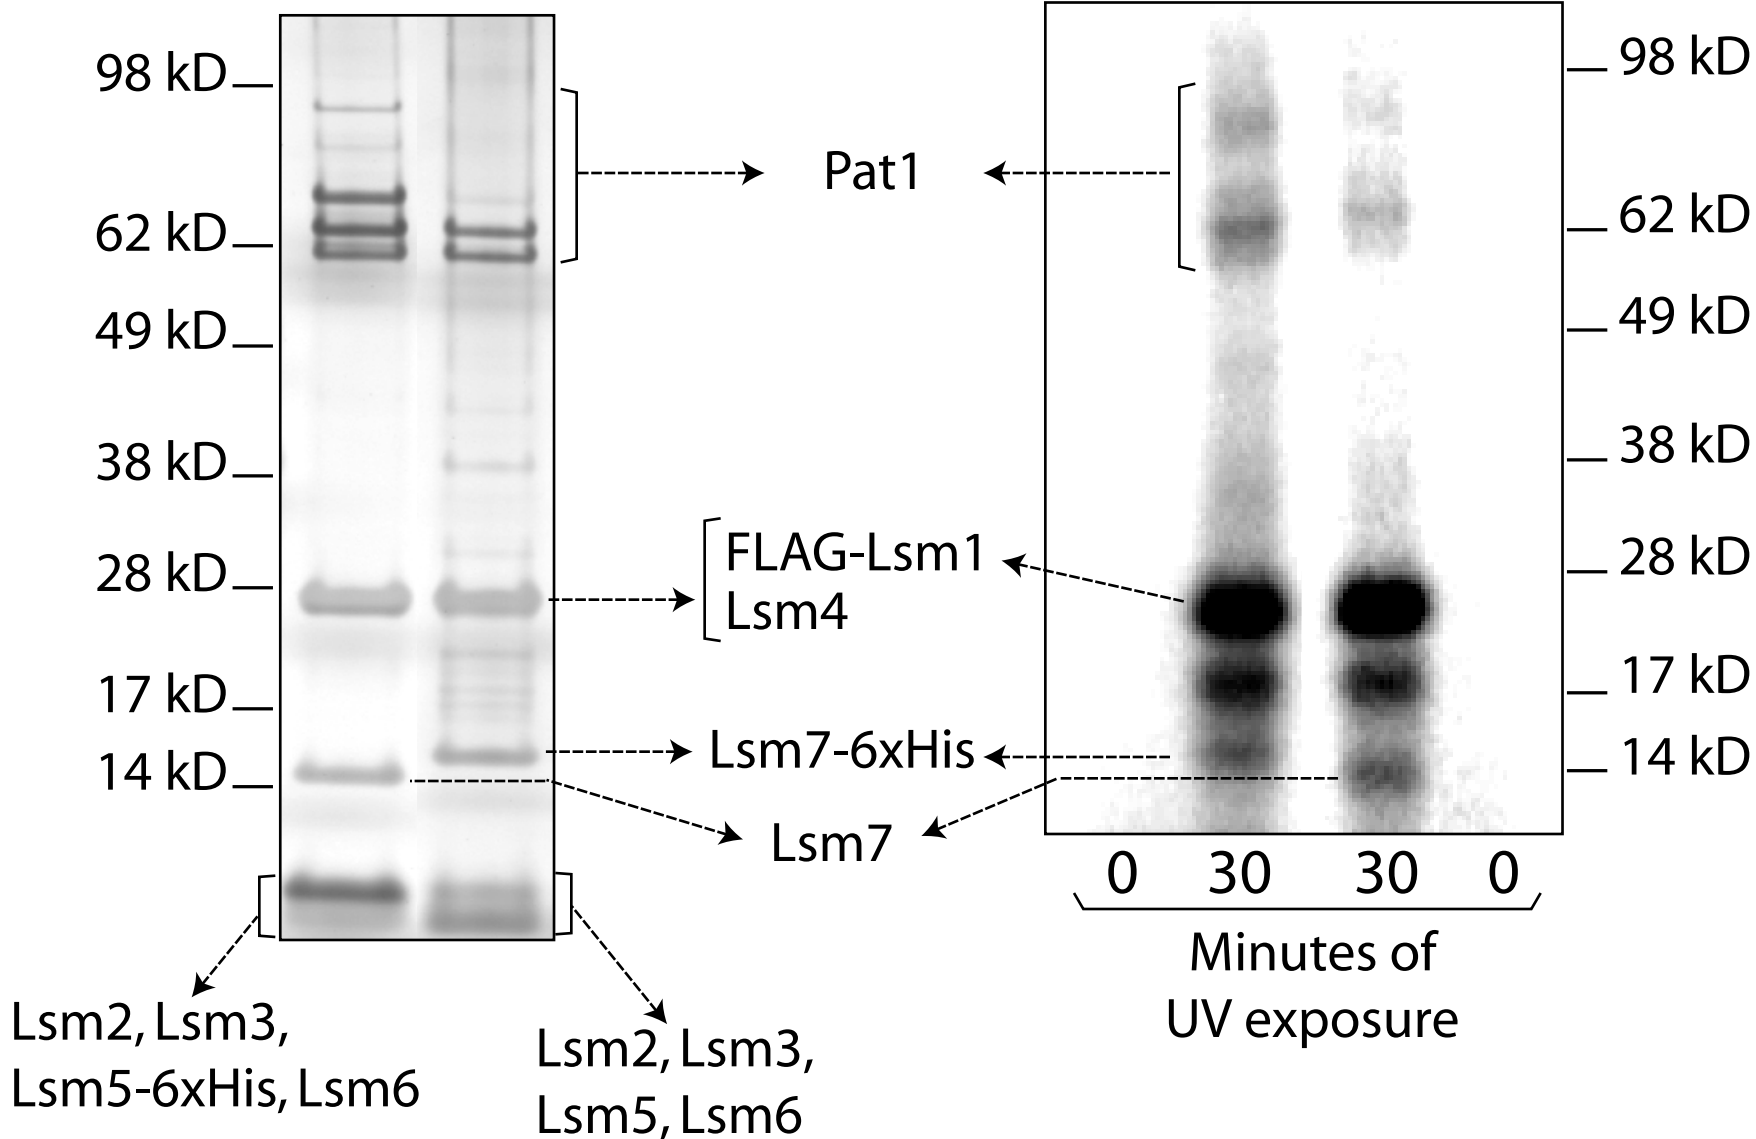

**A.**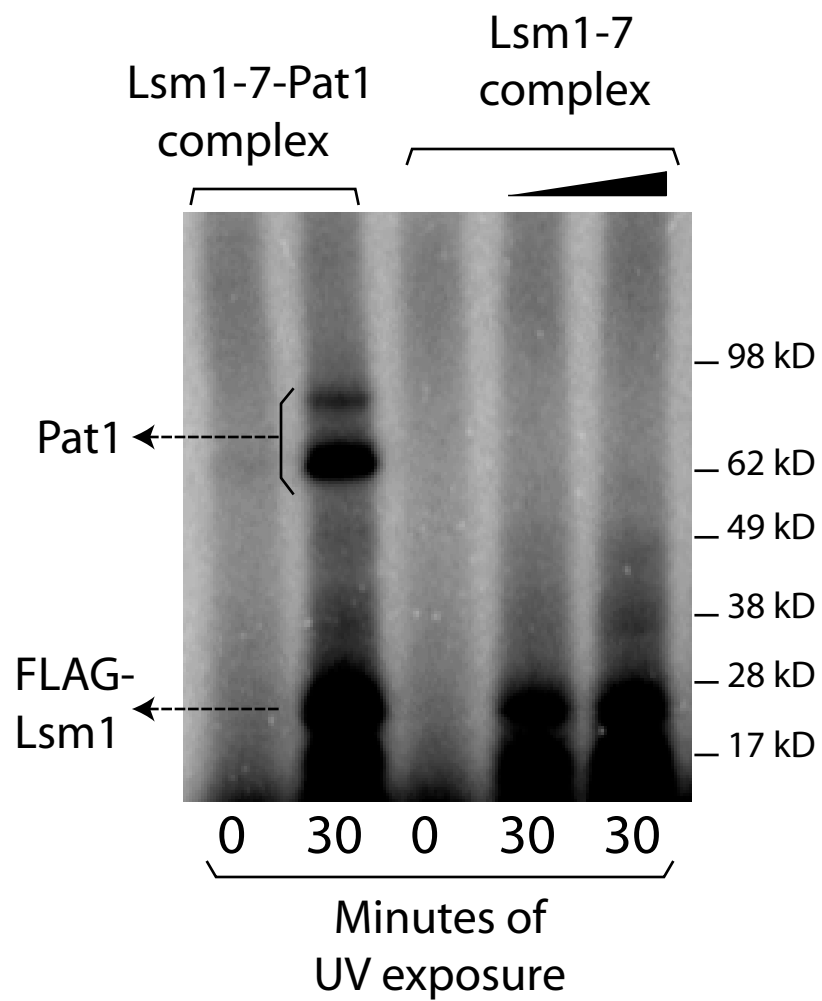**B.**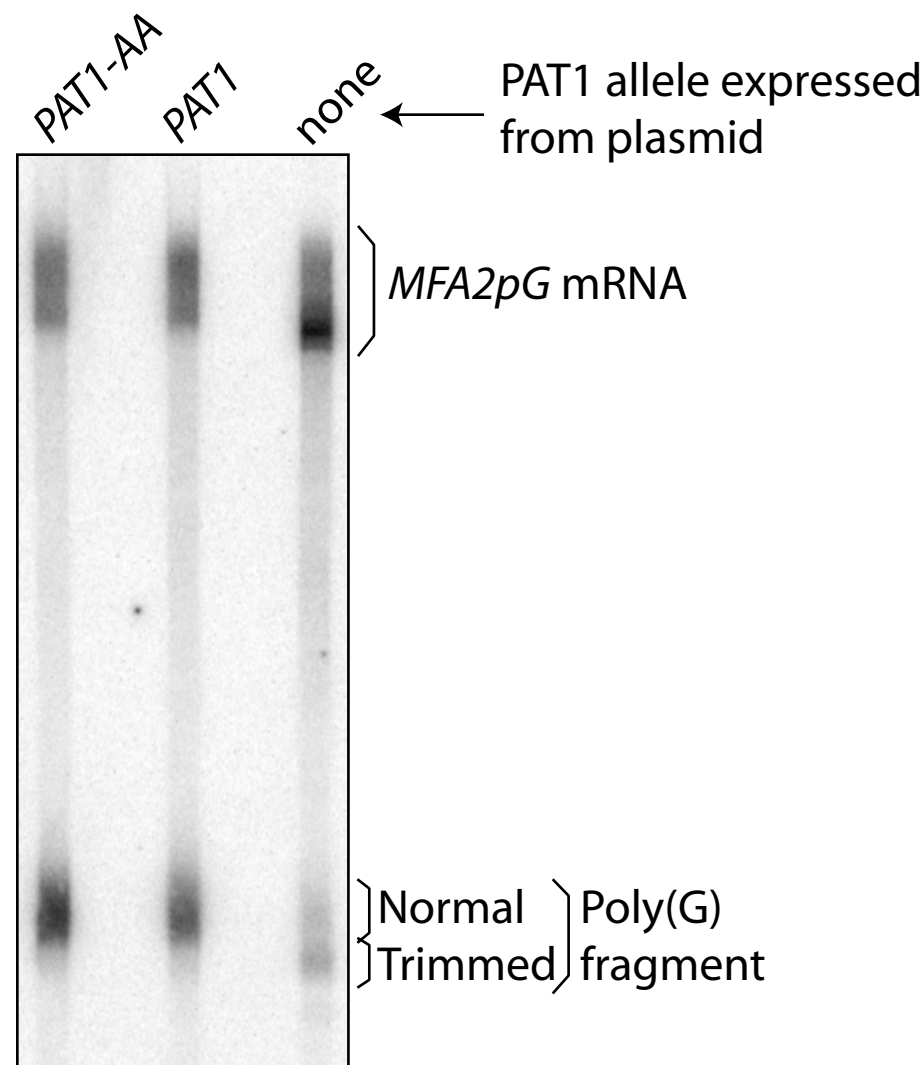

Supplement: supp_045252.114_SuppMaterial.pdf [file supp_045252.114_SuppMaterial.pdf]
